# Supplementary material for: Multifunctional two-dimensional perovskite based solar cells for photodetectors and resistive switching
Source: Royal Society of Chemistry journal article supplement (doi:10.1039/d3nr04861f), 2024-01-01
Supplement: d3nr04861f1.pdf [file d3nr04861f1.pdf]

## Supporting Information

### Multifunctional Two-dimensional Perovskite Solar Cells for Photodetector and Resistive Switching

Qing Dai, Zhenwang Luo, Guohua Ma, Yuchen Miao, Xu Wang, Zhenfu Zhao, Feiyu Zhao, Fei Zheng, Liqiang Zhu, Ziyang Hu\*

Department of Microelectronic Science and Engineering, Laboratory of Clean Energy Storage and Conversion, School of Physical Science and Technology, Ningbo Collaborative Innovation Center of Nonlinear Calamity System of Ocean and Atmosphere, Ningbo University, Ningbo 315211, China

\*Author to whom correspondence should be addressed: huziyang@nbu.edu.cn

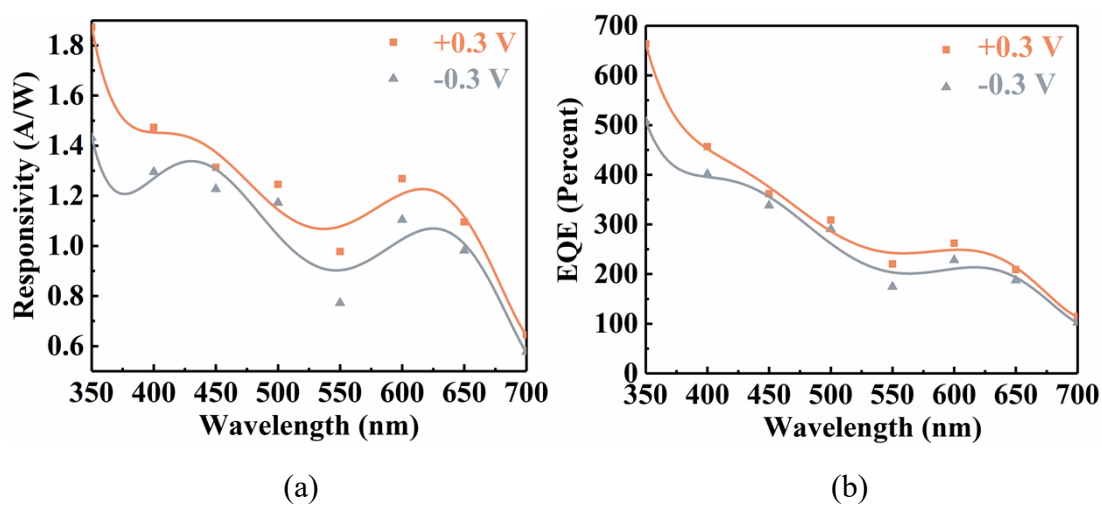

**Figure S1.** (a) Responsivity and (b) EQE spectra measured under +0.3 V, and -0.3 V of BA ( $n = 4$ ) device.

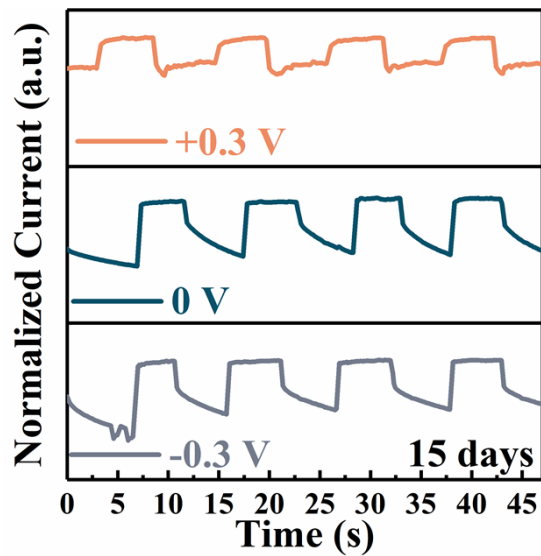

Figure S2. Photocurrent response ( $2.2 \text{ mW/cm}^2$ , 5 s duration, after 15 days).

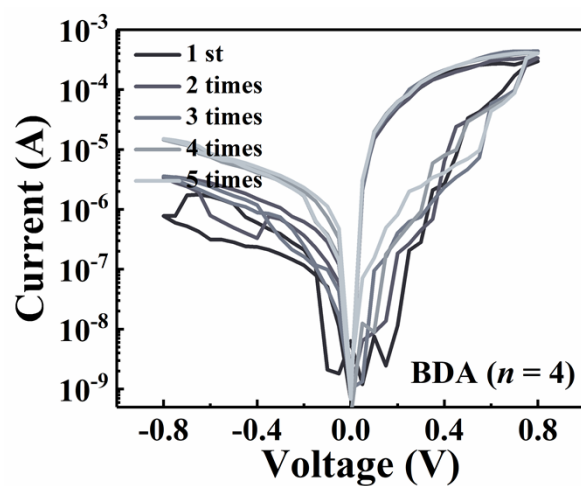

Figure S3. Cycle test of the BDA ( $n = 4$ ) device.

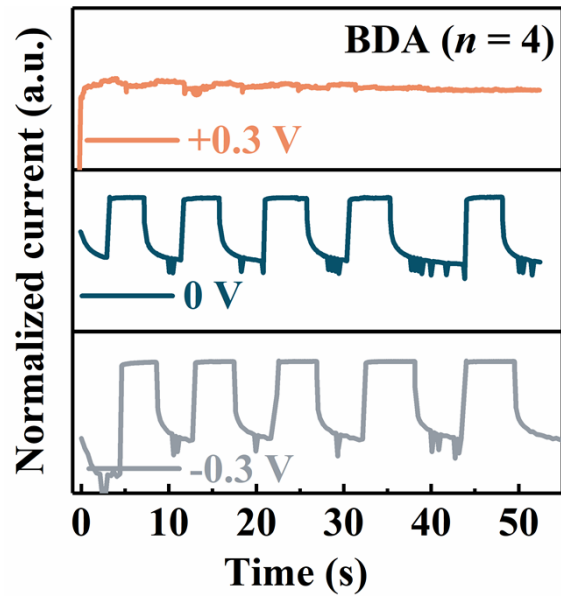

**Figure S4.** Photocurrent response upon light pulses ( $2.2 \text{ mW/cm}^2$ , 5 s duration) of the BDA ( $n = 4$ ) device.
